# Supplementary material for: Boosting the rate performance of primary Li/CFx batteries through interlayer conductive network engineering
Source: Royal Society of Chemistry journal article supplement (doi:10.1039/d3ta04102f), 2023-01-01
Supplement: d3ta04102f1.pdf [file d3ta04102f1.pdf]

## Electronic Supplementary Information

### Boosting Rate Performance of Primary Li/CF<sub>x</sub> Batteries through Interlayer Conductive Network Engineering

Fan Zhang,<sup>‡a</sup> Yingying Lan,<sup>‡a</sup> Renjie Li,<sup>a</sup> Jianlin Wang,<sup>b</sup> Shengxiang Wu,<sup>a</sup> Lejuan Cai,<sup>a</sup> Yu Zhao,<sup>b</sup> and Wenlong Wang,<sup>\*abc</sup>

<sup>a</sup> Songshan Lake Materials Laboratory, Dongguan, Guangdong 523808, China.

<sup>b</sup> State Key Laboratory for Surface Physics, Beijing National Laboratory for Condensed Matter Physics, Institute of Physics, Chinese Academy of Sciences, Beijing 100190, China. Email: [wwl@iphy.ac.cn](mailto:wwl@iphy.ac.cn)

<sup>c</sup> School of Physical Sciences, University of Chinese Academy of Sciences, Chinese Academy of Sciences, Beijing 100190, China

<sup>‡</sup> These authors contributed equally to the work.

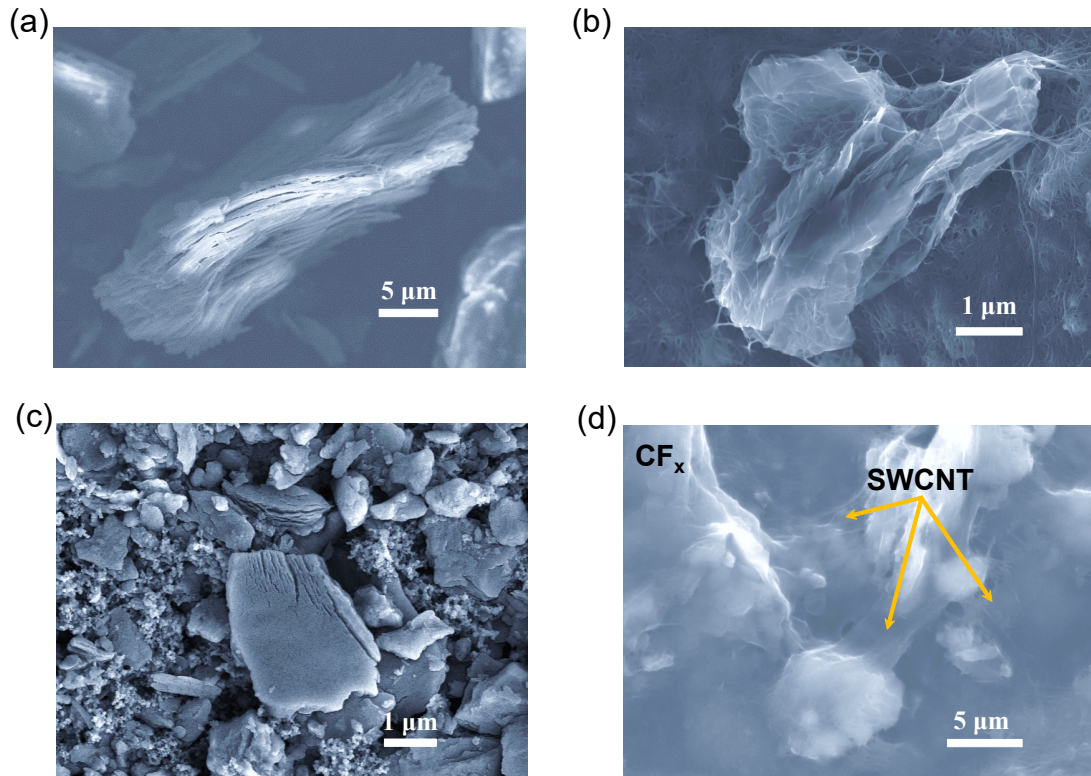

**Fig. S1** SEM image of (a) pristine  $CF_x$ , (b)  $CF_x$  with SWCNT incorporated, (c)  $CF_x$ /Super P composite and (d)  $CF_x$ /SWCNT sample fabricated with conventional slurry mixing method.

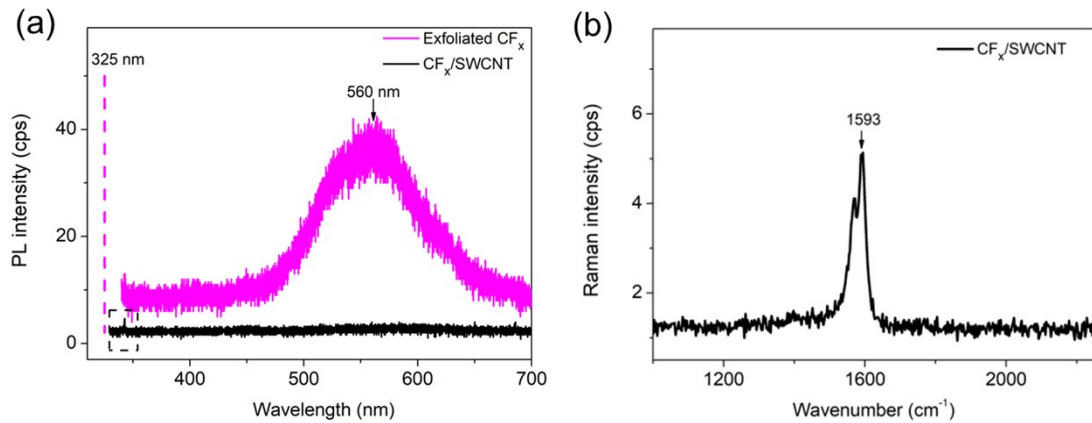

**Fig. S2** (a) PL spectra of exfoliated  $CF_x$  and  $CF_x$ /SWCNT hybrid film under 325 nm laser excitation with  $15\times$  NUV lens. Incident power density is  $5.9\ kW/cm^2$ ; (b) Raman spectrum of  $CF_x$ /SWCNT under 325 nm excitation.

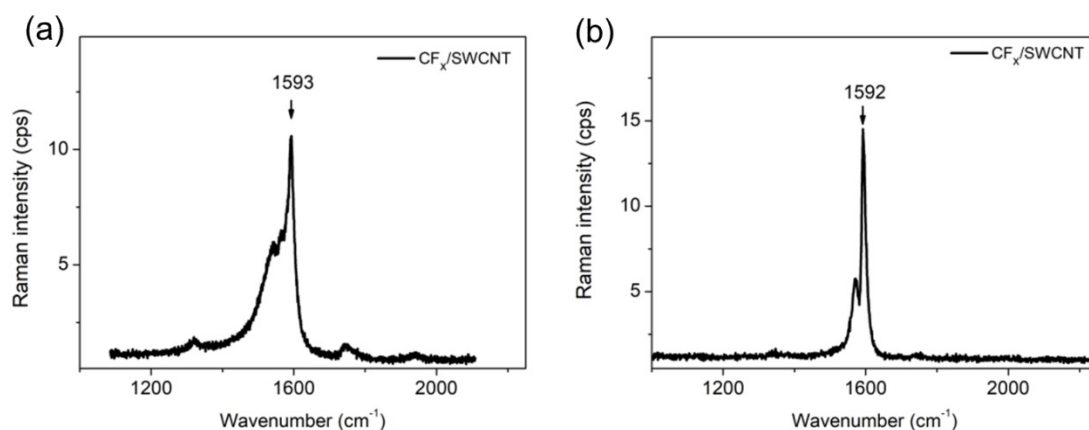

**Fig. S3** Raman spectrum of CF<sub>x</sub>/SWCNT under 633 nm (a) and 532 nm (b) excitation, corresponding to amplification of CF<sub>x</sub>/SWCNT spectra in Fig. 2a.

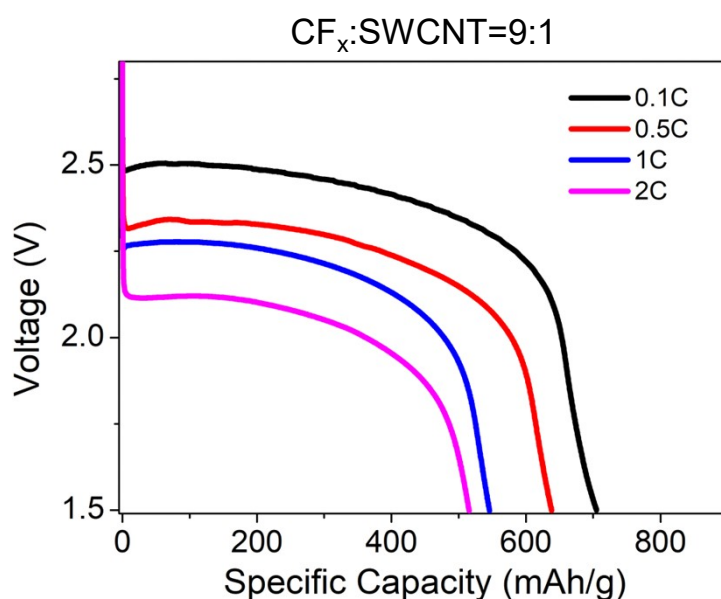

**Fig. S4** Galvanostatic charge-discharge curve of Li/CF<sub>x</sub> battery based on SWCNT cathode under different discharge rates. In this case, weight ratio of CF<sub>x</sub> to SWCNT is ~9:1.

**Table S1** EDX results of exfoliated CF<sub>x</sub>.

| Elements | Line | Mass%      | Atom%      |
|----------|------|------------|------------|
| C        | K    | 40.92±0.47 | 52.27±0.60 |
| F        | K    | 59.08±1.06 | 47.73±0.86 |
